# Supplementary material for: Molecular structure of 1,1,2,2-tetra-tert-butyldisilane: unusual structural motifs in sterically crowded disilanesElectronic supplementary information (ESI) available: Structural results from calculations at the HF level with the 3-21G* and 6-31G* basis sets (Table S1), geometric and amplitude restraints (Table S2), least-squares correlation matrix (Table S3), and experimental coordinates from the GED analysis (Table S4). See http://www.rsc.org/suppdata/dt/b3/b316701a/
Source: Royal Society of Chemistry journal article supplement (doi:10.1039/b316701a), 2004-01-01
Supplement: b316701a.pdf [file b316701a.pdf]

**Table S1** Molecular geometries of the  $C_2$  structure of 1,1,2,2-tetra-*tert*-butyldisilane and the  $C_1$  structure of 1,1,1,2-tetra-*tert*-butyldisilane at the HF level of theory with the 3-21G\* and 6-31G\* basis sets.<sup>a,b</sup>

| 1,1,2,2-tetra- <i>tert</i> -butyldisilane |            |            | 1,1,1,2-tetra- <i>tert</i> -butyldisilane |            |            |
|-------------------------------------------|------------|------------|-------------------------------------------|------------|------------|
| Parameter                                 | HF/3-21G*  | HF/6-31G*  | Parameter                                 | HF/3-21G*  | HF/6-31G*  |
| Si(1)-Si(2)                               | 241.3      | 243.5      | Si(1)-Si(2)                               | 239.8      | 244.2      |
| Si(2)-C(3)                                | 192.6      | 194.6      | Si(1)-C(19)                               | 195.1      | 197.6      |
| Si(2)-C(16)                               | 193.1      | 195.1      | Si(1)-C(32)                               | 195.4      | 198.0      |
| Si(2)-H(29)                               | 148.6      | 148.5      | Si(1)-C(45)                               | 194.5      | 197.1      |
| C-C (mean)                                | 155.3      | 154.2      | Si(2)-C(6)                                | 192.4      | 193.8      |
| C-H (mean)                                | 108.5      | 108.6      | Si(2)-H(3)                                | 148.6      | 148.5      |
| Si(1)-Si(2)-C(3)                          | 108.1      | 108.6      | Si(2)-H(4)                                | 148.6      | 148.5      |
| Si(1)-Si(2)-C(16)                         | 120.7      | 120.4      | C-C (mean)                                | 155.4      | 154.3      |
| C(3)-Si(2)-C(16)                          | 115.6      | 115.6      | C-H (mean)                                | 108.4      | 108.5      |
| Si(2)-C(3)-C(4)                           | 112.8      | 112.6      | Si(2)-Si(1)-C(19)                         | 107.9      | 108.1      |
| Si(2)-C(3)-C(5)                           | 112.6      | 111.7      | Si(2)-Si(1)-C(32)                         | 102.9      | 102.9      |
| Si(2)-C(3)-C(6)                           | 108.0      | 108.2      | Si(2)-Si(1)-C(45)                         | 110.4      | 110.8      |
| Si(2)-C(16)-C(17)                         | 110.1      | 109.8      | Si(1)-Si(2)-C(6)                          | 129.2      | 129.4      |
| Si(2)-C(16)-C(18)                         | 109.2      | 108.6      | Si(1)-Si(2)-H(3)                          | 106.2      | 105.7      |
| Si(2)-C(16)-C(19)                         | 114.8      | 114.6      | Si(1)-Si(2)-H(4)                          | 105.4      | 105.0      |
| C(4)-C(3)-Si(2)-Si(1)                     | 57.9       | 60.0       | C(19)-Si(1)-C(32)                         | 111.2      | 111.1      |
| C(17)-C(16)-Si(2)-Si(1)                   | 34.5       | 32.0       | C(19)-Si(1)-C(45)                         | 112.3      | 112.0      |
| H(30)-Si(1)-Si(2)-H(29)                   | -98.7      | -101.4     | C(32)-Si(1)-C(45)                         | 111.7      | 111.5      |
|                                           |            |            | C(32)-Si(1)-Si(2)-C(6)                    | -161.8     | -162.6     |
| Energy <sup>c</sup>                       | -1199.5665 | -1205.8378 | Energy <sup>c</sup>                       | -1199.5566 | -1205.8255 |

<sup>a</sup> All bond lengths in pm, all angles in °.

<sup>b</sup> See Figure 2 in main text for atom numbering.

<sup>c</sup> Absolute energy in Hartrees.

**Table S2** Interatomic distances ( $r$ /pm) and amplitudes of vibration ( $u$ /pm) for the GED structure of 1,1,2,2-tetra-*tert*-butyldisilane.<sup>a,b,c</sup>

| No.      | Atom Pair     | $r_a$ / pm | $u$ / pm <sup>b</sup>                      | Restraint | No.       | Atom Pair     | $r_a$ / pm | $u$ / pm <sup>b</sup>                      | Restraint |
|----------|---------------|------------|--------------------------------------------|-----------|-----------|---------------|------------|--------------------------------------------|-----------|
| $u_1$    | Si(1)-Si(2)   | 245.3(8)   | 6.3(6)                                     | 6.7(7)    | $u_{70}$  | C(19)...C(34) | 392.2(39)  | 12.2( <i>tied to <math>u_{59}</math></i> ) |           |
| $u_2$    | Si(1)-C(31)   | 194.4(2)   | 4.9(2)                                     |           | $u_{71}$  | C(3)...C(31)  | 435.3(36)  | 15.7( <i>tied to <math>u_{59}</math></i> ) |           |
| $u_3$    | Si(2)-C(3)    | 194.4(2)   | 4.9( <i>tied to <math>u_2</math></i> )     |           | $u_{72}$  | C(3)...C(34)  | 446.4(43)  | 12.3( <i>tied to <math>u_{59}</math></i> ) |           |
| $u_4$    | Si(2)-C(16)   | 194.4(2)   | 5.0( <i>tied to <math>u_2</math></i> )     |           | $u_{73}$  | C(6)...C(31)  | 446.4(43)  | 12.3( <i>tied to <math>u_{59}</math></i> ) |           |
| $u_5$    | Si(1)-C(44)   | 194.4(2)   | 5.0( <i>tied to <math>u_2</math></i> )     |           | $u_{74}$  | C(6)...C(32)  | 386.3(62)  | 26.2(32)                                   | 26.8(27)  |
| $u_6$    | Si(2)...C(17) | 281.9(15)  | 7.8(7)                                     | 9.4(9)    | $u_{75}$  | C(4)...C(34)  | 386.3(62)  | 26.2( <i>tied to <math>u_{74}</math></i> ) |           |
| $u_7$    | Si(1)...C(34) | 279.8(19)  | 7.5( <i>tied to <math>u_6</math></i> )     |           | $u_{76}$  | C(3)...C(44)  | 323.6(15)  | 8.9( <i>tied to <math>u_{74}</math></i> )  |           |
| $u_8$    | Si(2)...C(6)  | 279.8(19)  | 7.5( <i>tied to <math>u_6</math></i> )     |           | $u_{77}$  | C(3)...C(16)  | 323.6(15)  | 8.9( <i>tied to <math>u_{74}</math></i> )  |           |
| $u_9$    | Si(1)...C(45) | 281.9(15)  | 7.8( <i>tied to <math>u_6</math></i> )     |           | $u_{78}$  | C(3)...C(32)  | 411.2(34)  | 24.1( <i>tied to <math>u_{74}</math></i> ) |           |
| $u_{10}$ | Si(2)...C(19) | 286.4(15)  | 7.4( <i>tied to <math>u_6</math></i> )     |           | $u_{79}$  | C(4)...C(31)  | 411.2(34)  | 24.1( <i>tied to <math>u_{74}</math></i> ) |           |
| $u_{11}$ | Si(1)...C(47) | 286.4(15)  | 7.4( <i>tied to <math>u_6</math></i> )     |           | $u_{80}$  | C(5)...C(18)  | 357.6(44)  | 17.7(21)                                   | 17.3(17)  |
| $u_{12}$ | Si(1)...C(33) | 287.5(16)  | 7.4( <i>tied to <math>u_6</math></i> )     |           | $u_{81}$  | C(33)...C(46) | 357.6(44)  | 17.7( <i>tied to <math>u_{80}</math></i> ) |           |
| $u_{13}$ | Si(2)...C(5)  | 287.5(16)  | 7.4( <i>tied to <math>u_6</math></i> )     |           | $u_{82}$  | C(6)...C(44)  | 435.1(41)  | 16.1( <i>tied to <math>u_{80}</math></i> ) |           |
| $u_{14}$ | Si(2)...C(4)  | 296.2(13)  | 7.3( <i>tied to <math>u_6</math></i> )     |           | $u_{83}$  | C(16)...C(34) | 435.1(41)  | 16.1( <i>tied to <math>u_{80}</math></i> ) |           |
| $u_{15}$ | Si(1)...C(32) | 296.2(13)  | 7.3( <i>tied to <math>u_6</math></i> )     |           | $u_{84}$  | C(6)...C(45)  | 442.7(94)  | 26.0( <i>tied to <math>u_{80}</math></i> ) |           |
| $u_{16}$ | Si(2)...C(18) | 299.7(10)  | 7.2( <i>tied to <math>u_6</math></i> )     |           | $u_{85}$  | C(17)...C(34) | 442.7(94)  | 26.0( <i>tied to <math>u_{80}</math></i> ) |           |
| $u_{17}$ | Si(1)...C(46) | 299.7(10)  | 7.2( <i>tied to <math>u_6</math></i> )     |           | $u_{86}$  | C(31)...C(46) | 391.4(29)  | 14.0( <i>tied to <math>u_{80}</math></i> ) |           |
| $u_{18}$ | Si(2)...C(31) | 375.6(12)  | 10.3(14)                                   | 10.6(11)  | $u_{87}$  | C(3)...C(18)  | 391.4(29)  | 14.0( <i>tied to <math>u_{80}</math></i> ) |           |
| $u_{19}$ | Si(1)...C(17) | 351.1(23)  | 16.2( <i>tied to <math>u_{18}</math></i> ) |           | $u_{88}$  | C(3)...C(17)  | 451.9(14)  | 10.1( <i>tied to <math>u_{80}</math></i> ) |           |
| $u_{20}$ | Si(2)...C(45) | 351.1(23)  | 16.2( <i>tied to <math>u_{18}</math></i> ) |           | $u_{89}$  | C(31)...C(45) | 451.9(14)  | 10.1( <i>tied to <math>u_{80}</math></i> ) |           |
| $u_{21}$ | Si(1)...C(3)  | 375.6(12)  | 10.3( <i>tied to <math>u_{18}</math></i> ) |           | $u_{90}$  | C(6)...C(34)  | 502.5(64)  | 17.9( <i>tied to <math>u_{80}</math></i> ) |           |
| $u_{22}$ | Si(2)...C(34) | 392.9(13)  | 10.3( <i>tied to <math>u_{18}</math></i> ) |           | $u_{91}$  | Si(1)-H(30)   | 151.6(12)  | 8.2(11)                                    | 8.7(8)    |
| $u_{23}$ | Si(1)...C(6)  | 392.9(13)  | 10.3( <i>tied to <math>u_{18}</math></i> ) |           | $u_{92}$  | Si(2)-H(29)   | 151.6(12)  | 8.2( <i>tied to <math>u_{91}</math></i> )  |           |
| $u_{24}$ | Si(1)...C(16) | 362.3(15)  | 11.3(12)                                   | 10.2(11)  | $u_{93}$  | C(4)...C(33)  | 564.1(34)  | 22.7(20)                                   | 28.8(30)  |
| $u_{25}$ | Si(2)...C(44) | 362.3(15)  | 11.3( <i>tied to <math>u_{25}</math></i> ) |           | $u_{94}$  | C(6)...C(16)  | 453.1(19)  | 10.5( <i>tied to <math>u_{93}</math></i> ) |           |
| $u_{26}$ | Si(1)...C(4)  | 420.2(17)  | 17.1( <i>tied to <math>u_{25}</math></i> ) |           | $u_{95}$  | C(34)...C(44) | 453.1(19)  | 10.5( <i>tied to <math>u_{93}</math></i> ) |           |
| $u_{27}$ | Si(2)...C(32) | 420.2(17)  | 17.1( <i>tied to <math>u_{25}</math></i> ) |           | $u_{96}$  | C(4)...C(18)  | 468.2(39)  | 13.2( <i>tied to <math>u_{93}</math></i> ) |           |
| $u_{28}$ | C(3)-C(6)     | 155.7(1)   | 4.2(2)                                     |           | $u_{97}$  | C(32)...C(46) | 468.2(39)  | 13.2( <i>tied to <math>u_{93}</math></i> ) |           |
| $u_{29}$ | C(31)-C(34)   | 155.7(1)   | 4.2( <i>tied to <math>u_{28}</math></i> )  |           | $u_{98}$  | C(17)...C(45) | 472.7(100) | 24.9( <i>tied to <math>u_{93}</math></i> ) |           |
| $u_{30}$ | C(16)-C(17)   | 155.7(1)   | 4.2( <i>tied to <math>u_{28}</math></i> )  |           | $u_{99}$  | C(16)...C(31) | 477.0(27)  | 12.1( <i>tied to <math>u_{93}</math></i> ) |           |
| $u_{31}$ | C(44)-C(45)   | 155.7(1)   | 4.2( <i>tied to <math>u_{28}</math></i> )  |           | $u_{100}$ | C(3)...C(44)  | 477.0(27)  | 12.1( <i>tied to <math>u_{93}</math></i> ) |           |
| $u_{32}$ | C(3)-C(5)     | 155.7(1)   | 4.2( <i>tied to <math>u_{28}</math></i> )  |           | $u_{101}$ | C(19)...C(31) | 478.4(36)  | 12.7( <i>tied to <math>u_{93}</math></i> ) |           |
| $u_{33}$ | C(31)-C(33)   | 155.7(1)   | 4.2( <i>tied to <math>u_{28}</math></i> )  |           | $u_{102}$ | C(3)...C(47)  | 478.4(36)  | 12.7( <i>tied to <math>u_{93}</math></i> ) |           |
| $u_{34}$ | C(44)-C(47)   | 155.7(1)   | 4.2( <i>tied to <math>u_{28}</math></i> )  |           | $u_{103}$ | C(17)...C(31) | 480.8(59)  | 18.9( <i>tied to <math>u_{93}</math></i> ) |           |
| $u_{35}$ | C(16)-C(19)   | 155.7(1)   | 4.2( <i>tied to <math>u_{28}</math></i> )  |           | $u_{104}$ | C(3)...C(45)  | 480.8(59)  | 18.9( <i>tied to <math>u_{93}</math></i> ) |           |
| $u_{36}$ | C(16)-C(18)   | 155.7(1)   | 4.2( <i>tied to <math>u_{28}</math></i> )  |           | $u_{105}$ | C(16)...C(45) | 490.7(44)  | 17.6( <i>tied to <math>u_{93}</math></i> ) |           |
| $u_{37}$ | C(44)-C(46)   | 155.7(1)   | 4.2( <i>tied to <math>u_{28}</math></i> )  |           | $u_{106}$ | C(17)...C(44) | 490.7(44)  | 17.6( <i>tied to <math>u_{93}</math></i> ) |           |
| $u_{38}$ | C(31)-C(32)   | 155.7(1)   | 4.2( <i>tied to <math>u_{28}</math></i> )  |           | $u_{107}$ | C(4)...C(17)  | 506.8(24)  | 9.5( <i>tied to <math>u_{93}</math></i> )  |           |

|          |               |           |                                            |          |           |               |           |                                             |          |
|----------|---------------|-----------|--------------------------------------------|----------|-----------|---------------|-----------|---------------------------------------------|----------|
| $u_{39}$ | C(3)-C(4)     | 155.7(1)  | 4.2( <i>tied to <math>u_{28}</math></i> )  |          | $u_{108}$ | C(32)...C(45) | 506.8(24) | 9.5( <i>tied to <math>u_{93}</math></i> )   |          |
| $u_{40}$ | Si(2)...C(47) | 425.2(34) | 15.2(18)                                   | 15.5(16) | $u_{109}$ | C(5)...C(32)  | 564.1(34) | 22.7( <i>tied to <math>u_{93}</math></i> )  |          |
| $u_{41}$ | Si(1)...C(19) | 425.2(34) | 15.2( <i>tied to <math>u_{40}</math></i> ) |          | $u_{110}$ | C(6)...C(33)  | 580.4(38) | 28.1(34)                                    | 25.6(26) |
| $u_{42}$ | Si(2)...C(33) | 511.1(16) | 19.1(21)                                   |          | $u_{111}$ | C(34)...C(47) | 493.9(31) | 21.5( <i>tied to <math>u_{110}</math></i> ) |          |
| $u_{43}$ | Si(1)...C(18) | 501.6(15) | 11.7( <i>tied to <math>u_{42}</math></i> ) |          | $u_{112}$ | C(6)...C(19)  | 493.9(31) | 21.5( <i>tied to <math>u_{110}</math></i> ) |          |
| $u_{44}$ | Si(2)...C(46) | 501.6(15) | 11.7( <i>tied to <math>u_{42}</math></i> ) |          | $u_{113}$ | C(33)...C(45) | 502.3(28) | 18.4( <i>tied to <math>u_{110}</math></i> ) |          |
| $u_{45}$ | Si(1)...C(5)  | 511.1(16) | 19.1( <i>tied to <math>u_{42}</math></i> ) |          | $u_{114}$ | C(5)...C(17)  | 502.3(28) | 18.4( <i>tied to <math>u_{110}</math></i> ) |          |
| $u_{46}$ | C(5)...C(6)   | 256.3(31) | 10.5(9)                                    |          | $u_{115}$ | C(16)...C(44) | 509.6(26) | 15.3( <i>tied to <math>u_{110}</math></i> ) |          |
| $u_{47}$ | C(46)...C(47) | 246.3(30) | 10.4( <i>tied to <math>u_{46}</math></i> ) |          | $u_{116}$ | C(19)...C(32) | 542.4(48) | 19.2( <i>tied to <math>u_{110}</math></i> ) |          |
| $u_{48}$ | C(18)...C(19) | 246.3(30) | 10.4( <i>tied to <math>u_{46}</math></i> ) |          | $u_{117}$ | C(4)...C(47)  | 542.4(48) | 19.2( <i>tied to <math>u_{110}</math></i> ) |          |
| $u_{49}$ | C(4)...C(6)   | 249.9(26) | 10.2( <i>tied to <math>u_{46}</math></i> ) |          | $u_{118}$ | C(16)...C(32) | 552.0(32) | 20.3( <i>tied to <math>u_{110}</math></i> ) |          |
| $u_{50}$ | C(32)...C(34) | 249.9(26) | 10.2( <i>tied to <math>u_{46}</math></i> ) |          | $u_{119}$ | C(4)...C(44)  | 552.0(32) | 20.3( <i>tied to <math>u_{110}</math></i> ) |          |
| $u_{51}$ | C(4)...C(5)   | 250.4(25) | 10.5( <i>tied to <math>u_{46}</math></i> ) |          | $u_{120}$ | C(5)...C(34)  | 580.4(38) | 28.1( <i>tied to <math>u_{110}</math></i> ) |          |
| $u_{52}$ | C(32)...C(33) | 250.4(25) | 10.5( <i>tied to <math>u_{46}</math></i> ) |          | $u_{121}$ | C(5)...C(31)  | 585.3(32) | 23.5( <i>tied to <math>u_{110}</math></i> ) |          |
| $u_{53}$ | C(17)...C(18) | 250.9(23) | 10.3( <i>tied to <math>u_{46}</math></i> ) |          | $u_{122}$ | C(3)...C(33)  | 585.3(32) | 23.5( <i>tied to <math>u_{110}</math></i> ) |          |
| $u_{54}$ | C(45)...C(46) | 250.9(23) | 10.3( <i>tied to <math>u_{46}</math></i> ) |          | $u_{123}$ | C(34)...C(46) | 522.1(34) | 26.6(22)                                    | 18.7(20) |
| $u_{55}$ | C(45)...C(47) | 254.9(25) | 10.6( <i>tied to <math>u_{46}</math></i> ) |          | $u_{124}$ | C(6)...C(18)  | 522.1(34) | 26.6( <i>tied to <math>u_{123}</math></i> ) |          |
| $u_{56}$ | C(17)...C(19) | 254.9(25) | 10.6( <i>tied to <math>u_{46}</math></i> ) |          | $u_{125}$ | C(6)...C(17)  | 560.1(18) | 19.3( <i>tied to <math>u_{123}</math></i> ) |          |
| $u_{57}$ | C(33)...C(34) | 256.3(31) | 10.5( <i>tied to <math>u_{46}</math></i> ) |          | $u_{126}$ | C(34)...C(45) | 560.1(18) | 19.3( <i>tied to <math>u_{123}</math></i> ) |          |
| $u_{58}$ | C(4)...C(32)  | 364.5(43) | 46.5( <i>tied to <math>u_{46}</math></i> ) |          | $u_{127}$ | C(17)...C(46) | 571.2(35) | 31.5( <i>tied to <math>u_{123}</math></i> ) |          |
| $u_{59}$ | C(4)...C(19)  | 338.9(40) | 14.4(18)                                   | 14.8(15) | $u_{128}$ | C(18)...C(45) | 571.2(35) | 31.5( <i>tied to <math>u_{123}</math></i> ) |          |
| $u_{60}$ | C(32)...C(47) | 338.9(40) | 14.4( <i>tied to <math>u_{59}</math></i> ) |          | $u_{129}$ | C(17)...C(33) | 576.4(59) | 46.5( <i>tied to <math>u_{123}</math></i> ) |          |
| $u_{61}$ | C(3)...C(19)  | 346.9(34) | 14.9( <i>tied to <math>u_{59}</math></i> ) |          | $u_{130}$ | C(5)...C(45)  | 576.4(59) | 46.5( <i>tied to <math>u_{123}</math></i> ) |          |
| $u_{62}$ | C(31)...C(47) | 346.9(34) | 14.9( <i>tied to <math>u_{59}</math></i> ) |          | $u_{131}$ | C(18)...C(34) | 586.0(35) | 30.2( <i>tied to <math>u_{123}</math></i> ) |          |
| $u_{63}$ | C(33)...C(44) | 354.9(29) | 14.8( <i>tied to <math>u_{59}</math></i> ) |          | $u_{132}$ | C(6)...C(46)  | 586.0(35) | 30.2( <i>tied to <math>u_{123}</math></i> ) |          |
| $u_{64}$ | C(5)...C(16)  | 354.9(29) | 14.8( <i>tied to <math>u_{59}</math></i> ) |          | $u_{133}$ | C(4)...C(45)  | 589.1(56) | 38.2( <i>tied to <math>u_{123}</math></i> ) |          |
| $u_{65}$ | C(33)...C(47) | 378.8(48) | 22.4( <i>tied to <math>u_{59}</math></i> ) |          | $u_{134}$ | C(17)...C(32) | 589.1(56) | 38.2( <i>tied to <math>u_{123}</math></i> ) |          |
| $u_{66}$ | C(5)...C(19)  | 378.8(48) | 22.4( <i>tied to <math>u_{59}</math></i> ) |          | $u_{135}$ | C(5)...C(44)  | 603.7(32) | 36.2( <i>tied to <math>u_{123}</math></i> ) |          |
| $u_{67}$ | C(32)...C(44) | 381.8(23) | 9.8( <i>tied to <math>u_{59}</math></i> )  |          | $u_{136}$ | C(16)...C(33) | 603.7(32) | 36.2( <i>tied to <math>u_{123}</math></i> ) |          |
| $u_{68}$ | C(4)...C(16)  | 381.8(23) | 9.8( <i>tied to <math>u_{59}</math></i> )  |          | $u_{137}$ | C(19)...C(33) | 610.5(45) | 35.7( <i>tied to <math>u_{123}</math></i> ) |          |

<sup>a</sup> Estimated standard deviations, obtained in the least-squares refinement, are given in parentheses.

<sup>b</sup> Amplitudes not refined were fixed at the values obtained using the HF/6-31G\* force field.

<sup>c</sup> C-H amplitude ( $u_{147}$ ) was also refined:  $r_a = 113.6$  pm,  $u = 6.0(1)$  pm, with  $u_{148}$ - $u_{182}$  (all C-H) tied to  $u_{147}$ .

**Table S3** Least squares correlation matrix ( $\times 100$ ) for the GED refinement of 1,1,2,2-tetra-*tert*-butyldisilane.<sup>a</sup>

|          | $p_5$ | $p_7$<br>56 | $p_8$ | $p_{16}$ | $p_{17}$ | $p_{18}$ | $p_{22}$ | $p_{23}$ | $p_{31}$ | $u_{36}$ | $u_{182}$ | $u_{183}$<br>59 |
|----------|-------|-------------|-------|----------|----------|----------|----------|----------|----------|----------|-----------|-----------------|
| $p_2$    |       |             |       |          |          |          |          |          |          |          |           |                 |
| $p_4$    | -99   |             |       |          |          |          |          |          |          |          |           |                 |
| $p_{10}$ |       |             |       | 61       | 61       |          |          |          |          |          |           |                 |
| $p_{21}$ |       |             |       |          |          |          |          |          |          |          |           | -60             |
| $p_{17}$ |       |             |       | 56       |          |          |          |          |          |          |           |                 |
| $p_{18}$ |       |             |       | -73      |          |          |          |          |          |          |           |                 |
| $p_{23}$ |       |             |       |          |          |          |          |          |          |          |           |                 |
| $p_{24}$ |       |             |       |          |          | 50       | -53      |          |          |          |           |                 |
| $p_{25}$ |       |             |       |          |          |          |          |          |          |          | 60        |                 |
| $p_{29}$ |       |             | -57   |          |          |          |          | -50      |          |          |           |                 |
| $p_{30}$ |       |             |       |          |          |          |          |          | -61      |          |           |                 |
| $k_2$    |       |             |       |          |          |          |          |          |          | 53       |           |                 |

<sup>a</sup> Only elements with absolute values  $\geq 50\%$  are shown;  $k_2$  is a scale factor.

**Table S4** Experimental gas electron diffraction coordinates from the refinement of 1,1,2,2-tetra-*tert*-butyldisilane.

| Atom Number | x       | y       | z      |
|-------------|---------|---------|--------|
| Si(1)       | -1.2261 | 0.0000  | 0.0000 |
| Si(2)       | 1.2261  | 0.0000  | 0.0000 |
| C(3)        | 2.1096  | -0.6311 | 1.6121 |
| C(4)        | 1.8152  | -2.1091 | 1.9971 |
| C(5)        | 3.6515  | -0.4869 | 1.4681 |
| C(6)        | 1.5681  | 0.2589  | 2.7670 |
| H(7)        | 1.7824  | -2.7984 | 1.0955 |
| H(8)        | 2.6361  | -2.4454 | 2.7059 |
| H(9)        | 0.8143  | -2.1321 | 2.5328 |
| H(10)       | 4.0349  | -1.4117 | 0.9324 |
| H(11)       | 3.9524  | 0.4425  | 0.8894 |

|       |         |         |         |
|-------|---------|---------|---------|
| H(12) | 4.0879  | -0.4432 | 2.5154  |
| H(13) | 0.4492  | 0.4380  | 2.6944  |
| H(14) | 1.8083  | -0.2684 | 3.7435  |
| H(15) | 2.1179  | 1.2514  | 2.7231  |
| C(16) | 1.9124  | -0.8406 | -1.6125 |
| C(17) | 0.8962  | -0.5351 | -2.7497 |
| C(18) | 3.3208  | -0.4041 | -2.1076 |
| C(19) | 2.0254  | -2.3756 | -1.3886 |
| H(20) | -0.0233 | -1.1767 | -2.5707 |
| H(21) | 0.5972  | 0.5596  | -2.7876 |
| H(22) | 1.3848  | -0.8322 | -3.7306 |
| H(23) | 3.1925  | 0.5465  | -2.7151 |
| H(24) | 4.0466  | -0.2177 | -1.2546 |
| H(25) | 3.7185  | -1.2330 | -2.7739 |
| H(26) | 1.2241  | -2.7767 | -0.6912 |
| H(27) | 1.9331  | -2.8747 | -2.4042 |
| H(28) | 3.0523  | -2.5848 | -0.9516 |
| H(29) | 1.7517  | 1.4219  | 0.0000  |
| H(30) | -1.7517 | -0.2323 | -1.4028 |
| C(31) | -2.1096 | -1.4874 | 0.8860  |
| C(32) | -1.8152 | -1.6258 | 2.4069  |
| C(33) | -3.6515 | -1.3688 | 0.7202  |
| C(34) | -1.5681 | -2.7722 | 0.1965  |
| H(35) | -1.7824 | -0.6237 | 2.9398  |
| H(36) | -2.6361 | -2.2701 | 2.8545  |
| H(37) | -0.8143 | -2.1505 | 2.5172  |
| H(38) | -4.0349 | -0.6893 | 1.5451  |
| H(39) | -3.9524 | -0.9497 | -0.2913 |
| H(40) | -4.0879 | -2.4092 | 0.8481  |
| H(41) | -0.4492 | -2.7297 | 0.0080  |
| H(42) | -1.8083 | -3.6493 | 0.8763  |
| H(43) | -2.1179 | -2.8910 | -0.7898 |
| C(44) | -1.9124 | 1.7282  | 0.5659  |
| C(45) | -0.8962 | 2.8002  | 0.0788  |
| C(46) | -3.3208 | 2.1453  | 0.0545  |
| C(47) | -2.0254 | 1.7579  | 2.1169  |
| H(48) | 0.0233  | 2.7284  | 0.7410  |
| H(49) | -0.5972 | 2.6587  | -1.0074 |
| H(50) | -1.3848 | 3.8165  | 0.2117  |
| H(51) | -3.1925 | 2.5894  | -0.9826 |
| H(52) | -4.0466 | 1.2733  | 0.0099  |
| H(53) | -3.7185 | 2.9380  | 0.7634  |
| H(54) | -1.2241 | 1.1354  | 2.6265  |
| H(55) | -1.9331 | 2.8415  | 2.4434  |
| H(56) | -3.0523 | 1.3610  | 2.3946  |

---
